# Supplementary material for: A Combined Near-Infrared and Mid-Infrared Spectroscopic Approach for the Detection and Quantification of Glycine in Human Serum
Source: MDPI journal article supplement (doi:10.3390/s22124528), 2022-06-15
Supplement: s1 [file s1]

## Supplementary Information

### Near-Infrared Combined with Mid-Infrared Spectroscopic Detection of Low-Molecular Weight Proteins in Human Serum Using Glycine as a Model Protein

Thulya Chakkumpulakkal Puthan Veetil <sup>1,2</sup> and Bayden R. Wood <sup>1,\*</sup>

<sup>1</sup> Centre for Biospectroscopy, Monash University, Clayton, VIC 3800, Australia;  
thulya.chakkumpulakkalputhanveetil@monash.edu

<sup>2</sup> Centre for Sustainable and Circular Technologies (CSCT), University of Bath, Bath BA2 7AY, UK

\* Correspondence: bayden.wood@monash.edu

#### Spectral Analysis of spiked serum samples: ATR spectroscopy

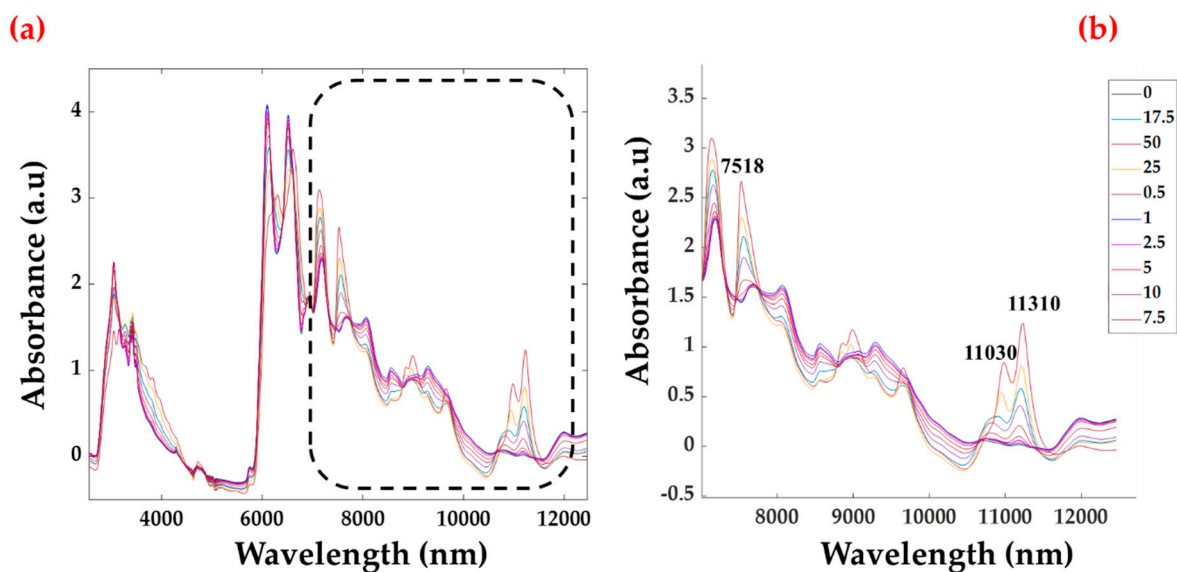

**Figure S1.** **a)** Baseline corrected raw spectra of glycine spiked human plasma samples. The concentration of glycine is ranging from 0 – 50 mg/ml. **b)** magnified view of 12000 – 7000 nm region where major contribution from glycine is observed.

(a)

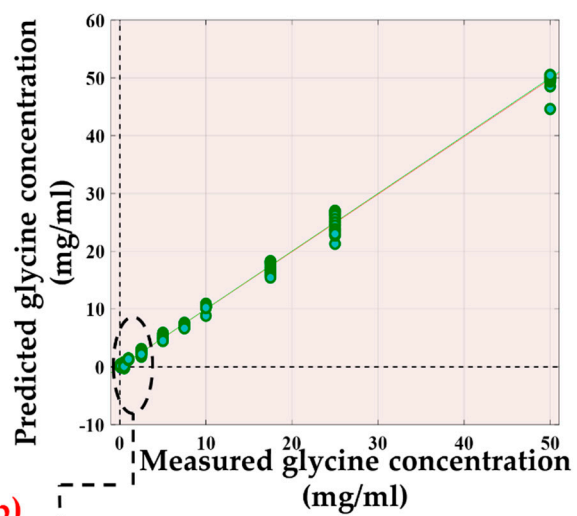

(b)

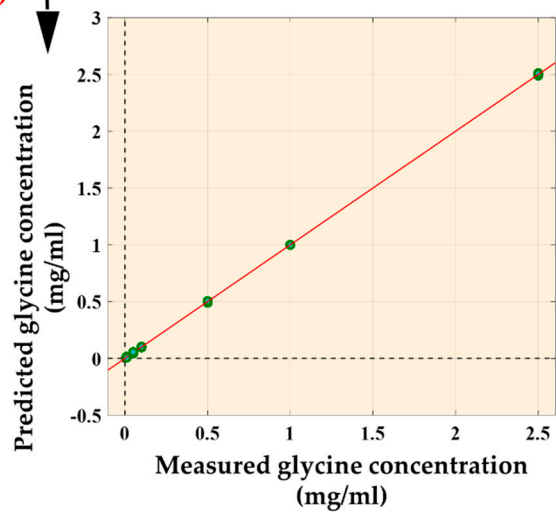

(c)

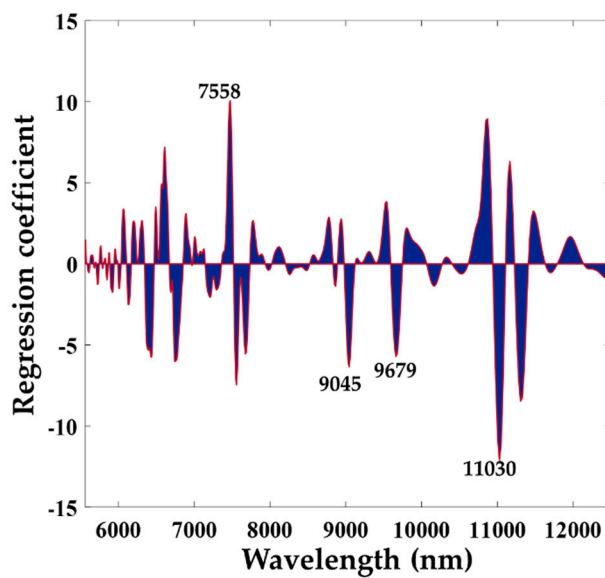

Figure S2. PLS – regression plot and its associated regression vector in the 12500 – 5555 nm region.

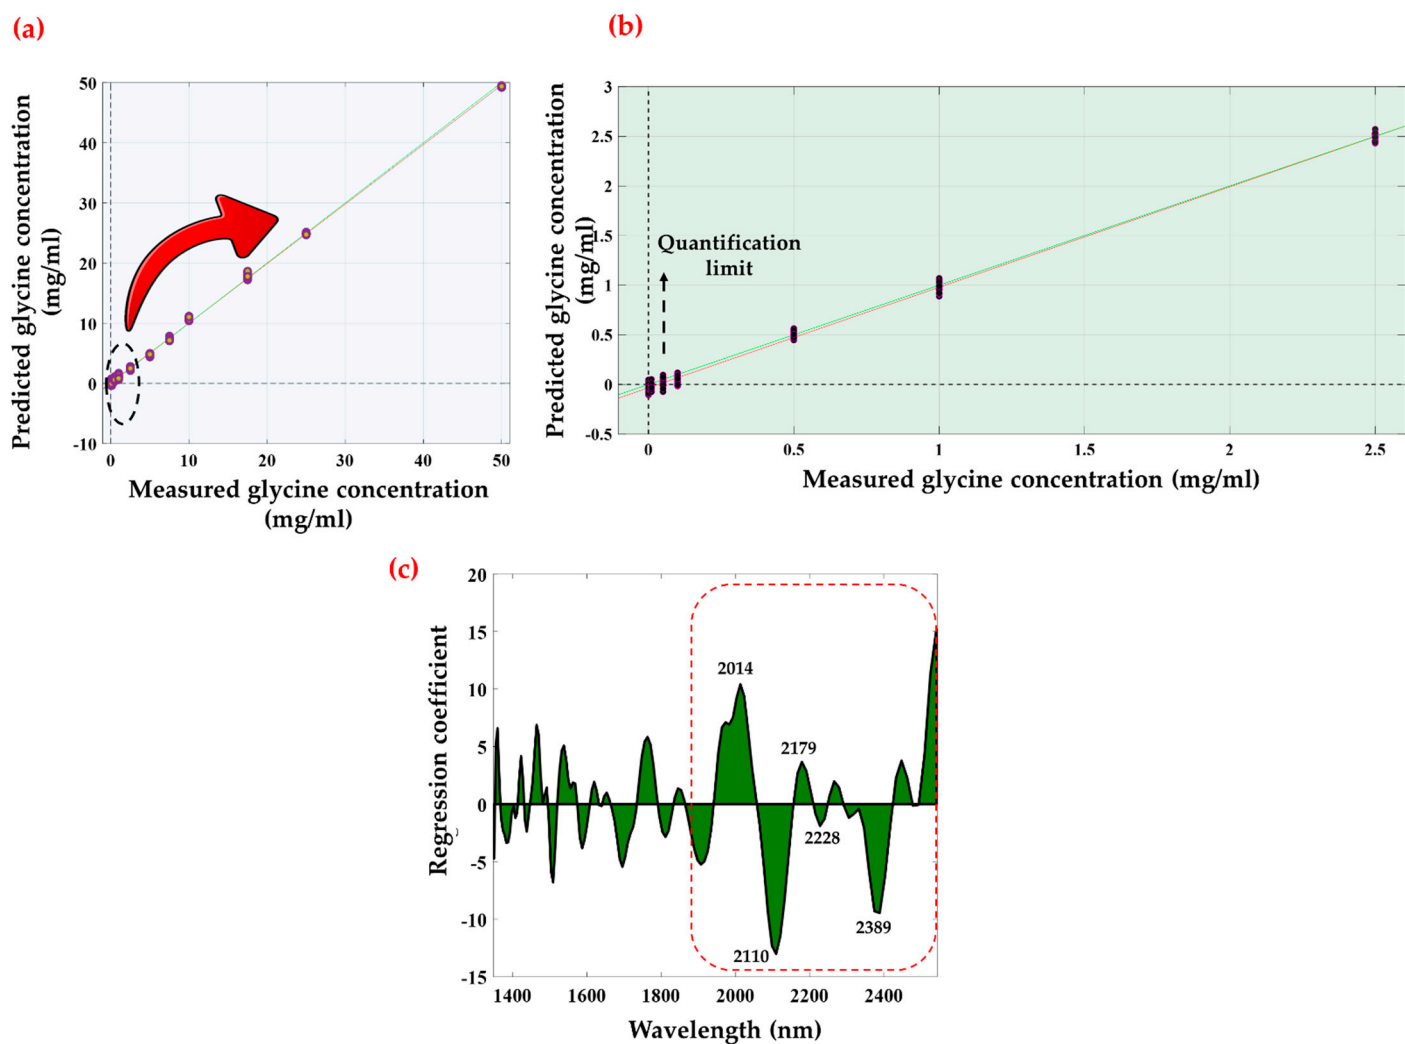

**Figure S3.** PLS – regression plot and its associated regression vector in the 2500 – 1350 nm region.

**Table S1.** Major band positions observed from the NIR and MIR spectra.

| Band                  | Band Assignment                                               |
|-----------------------|---------------------------------------------------------------|
| 906 $\text{cm}^{-1}$  | $\text{CH}_2$ rocking from glycine                            |
| 1036 $\text{cm}^{-1}$ | C–N stretching from glycine                                   |
| 1111 $\text{cm}^{-1}$ | N–H <sub>3</sub> rocking from glycine                         |
| 1330 $\text{cm}^{-1}$ | C H <sub>2</sub> wagging from glycine                         |
| 1414 $\text{cm}^{-1}$ | O–C=O symmetric stretching from glycine from glycine          |
| 2055 nm               | N–H stretch/amide Ib combination band                         |
| 2110 nm               | (N–H + C–H) combination band from glycine                     |
| 2180 nm               | N–H bend second overtone, C–H stretch/C=O stretch combination |

|         |                                                             |
|---------|-------------------------------------------------------------|
|         | and C=O stretch/amide IIIb combination mode                 |
| 2204 nm | combinations of (C-H and C-H) stretching modes from glycine |
| 2375 nm | combinations of (C-H and C-H) stretching modes from glycine |

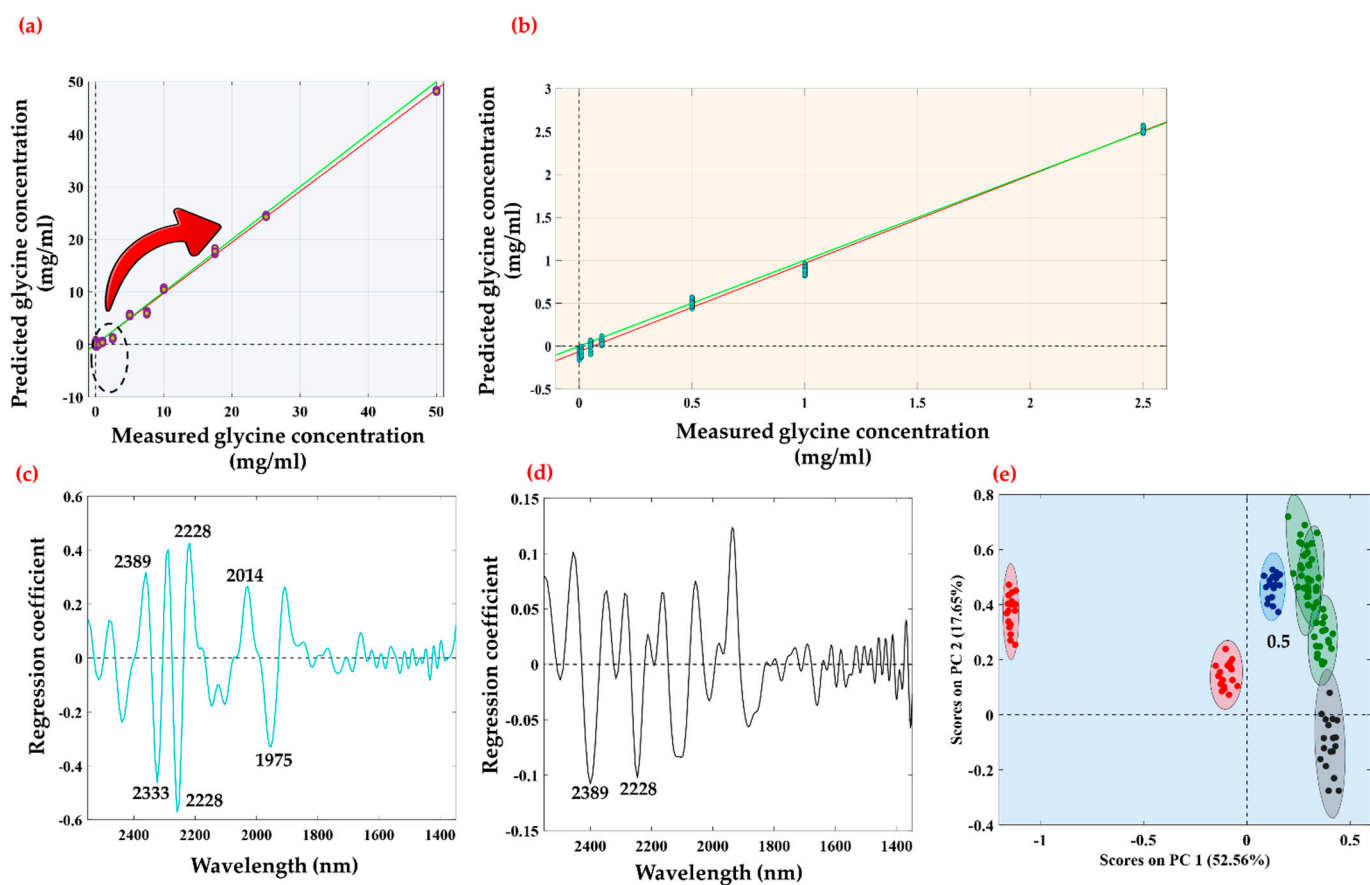

**Figure S4.** PCR predicted model of glycine spiked serum samples and it's a) regression plot of entire range between 0 (control) – 50 mg/mL region b) remodelled 0 – 2.5 mg/mL c) corresponding regression coefficient/vector for 0 – 50 mg/mL d) 0 – 2.5 mg/mL over 2500 – 2000 nm region. e) corresponding PC scores plot.

**Table S2.** Values associated with the LoB and LoD calculation from the regression statistics.

| <b>Method</b>                 | <b>Mean<sub>blank</sub></b> | <b>SD<sub>blank</sub></b> | <b>LoB</b>    | <b>SD<sub>low concentration</sub></b> | <b>LoD</b>   |
|-------------------------------|-----------------------------|---------------------------|---------------|---------------------------------------|--------------|
| <b>ATR</b>                    | <b>-0.187</b>               | <b>0.132</b>              | <b>0.030</b>  | <b>0.142</b>                          | <b>0.265</b> |
| <b>NIR</b>                    | <b>-0.032</b>               | <b>0.129</b>              | <b>0.181</b>  | <b>0.0288</b>                         | <b>0.228</b> |
| <b>Combined<br/>ATR - NIR</b> | <b>-0.217</b>               | <b>0.1536</b>             | <b>0.0354</b> | <b>0.0821</b>                         | <b>0.170</b> |
